# Supplementary material
Source: PubMed Central journal article supplement (PMC5308886)
Supplement: NIHMS839722-supplement-9.pdf [file NIHMS839722-supplement-9.pdf]

## Data S1: MATLAB Code for CaSCaDe Analysis

```
function res=Cal_anl_main2sa_forreview(im0)
% input :
%   im0 : is n frame video data stored in cell array (n by 1 cell)
% output :
%   res: results output
    clc
    im0=im0(:);

%% parameter setting;

    % basic analysis criteria setting
    p.foffset=60; % how many initial frames to exclude in analysis
    p.norm_signal='std'; % ('std','bkg','sub') % different way to
normalize intenisty
    p.spf=1 ; % frame rate at acquisition

    % event detection
    p.min_int_ed=0.5; % minimum intenisty value for start-end of a
event;
    p.peak_int_ed=5.0 ; % minimum peak intesnity value for being
considered as signal
    p.min_peak_dist_ed= 4 ;
    p.min_peak_length=4;
    % background trending correction
    p.int_correct= 0; % if 1, correct bkg, if 0, no correction.

% main code
%% read information regarding images and conditions.
% system parameter
knn=1;
fii=1;

    [hh,ww]=size(im0{1});
    iminfo.Height=hh;
    iminfo.Width=ww;

%% analysis individual condition section

% generate data name based on condition id, image id and drug id.
%% acquire image data for this condition
tic
    % set frame of interests for each conditions
    fini=1+p.foffset;
    fend=length(im0);
    frameset0=(fini:fend);

%% spatial temporal convolution
% set data output folder
% processing images.
clear M
```

```

im0temp=im0(frameset0);

%% identify domain candidates

im3f=bpass3d_v1(im0temp);
[bff]=sum(im3f,3);
bff=bff/length(frameset0);
bw=domain_segment(bff) ;
L=bwlabel(bw);

% obtain domains information
stats=regionprops(bw,'area'); % get area of each mode
A=[stats.Area];
obnum=max(L(:)); % all detected node from spatial discrepancy

%%%%%%%%%%
%% recording the intenisty of each modes and normalization
% initiate output variables
if obnum>0
    intout=get_domain_int(im0temp,L);
    % get normalized intensity by doamin size.(inout0)
    intout0=intout./(ones(length(intout(:,1)),1)*A(:)');
    if p.int_correct % correction for intensity shift, possible
photobleaching effect
        [bkg_int]=get_bkg_int(intout0);
        intout0=intout0-bkg_int;
    end

    % need to normalize the intout / normalized the intensity.
    bg00=zeros(size(intout0(1,:))'); rbg00=bg00;
    parfor k99=1:length(intout0(1,:))
        [bg,rbg]=estibkg(intout0(:,k99),7); % estimate the background;
        bg00(k99)=bg;
        rbg00(k99)=rbg;
    end
    medmat=ones(size(intout0(:,1)))*bg00';
    stdmat=ones(size(intout0(:,1)))*rbg00';

% intenity profile with different normalization
intoutb1=(intout0-medmat)./stdmat; %normalized signal
intoutb2=(intout0-medmat)./medmat; %normalized signal
intoutb3=(intout0-medmat); %normalized signal

switch(p.norm_signal)
    case('std')
        intoutf=intoutb1;
    case('bkg')
        intoutf=intoutb2;
    case('sub')
        intoutf=intoutb3;
end

%% peak detecting at individaul domains and processing.

[pkout0, intoutbw]=peak_detect_v2(intoutf,p);

```

```

% get intensity value of event peak at different normalization method

pk_int1=get_peak_intprofile(pkout0,intoutb1);
pk_int2=get_peak_intprofile(pkout0,intoutb2);
pk_int3=get_peak_intprofile(pkout0,intoutb3);

pkout=[pkout0,[pk_int1 pk_int2 pk_int3]];
% pkout format: domain id/ peak location/peak length/peak height/
% peak initial frame/ end frame

end

%% get features of peaks
pknum=0;
if ~isempty(pkout)
    pk_DA=A(pkout(:,1)); % corresponding domain size of individual
events
    pk_bg=bg00(pkout(:,1)); % background intensity
    pk_rbg=rbg00(pkout(:,1)); % standard dev.
    pknum=length(pkout(:,1));

    peakfeatures=zeros(pknum,75);

    peak_int_t=cell(pknum,1); % variable to store all detected peak
profiles
    % go through individual events,
    for kpk=1:pknum;
        % get peak features for peaks

        intp= intoutf(:,pkout(kpk,1)) ; % intensity profile of this
event.
        intp2=intoutbw(:,pkout(kpk,1));

        ilb = bpass1d(intp,1,11);
        ilb2= bpass1d(intp,1,21);

        L1=bwlabel(intp2);
        bwint= L1==L1(pkout(kpk,2));

        itest=intp(bwint);
        itestb=ilb(bwint);
        itestb2=ilb2(bwint);

        fs1=get_peak_feature(itest);
        fs2=get_peak_feature(itestb);
        fs3=get_peak_feature(itestb2);

        peakfeatures(kpk,:)=[fs1',fs2',fs3'];
        peak_int_t{kpk}=itest;
    end
    pkinfo=[knn*ones(pknum,1),fii*ones(pknum,1),1*ones(pknum,1),
pkout, pk_DA(:,1),pk_bg(:,1), pk_rbg(:,1)];
else

```

```

end

%% SVM-classification for peaks;
if ~isempty(pkout)
% % %
    % load previous established svm model
    % model 1
    load(Bulit_svm_model)

    Lower=modelparm.Lower ;
    Upper=modelparm.Upper ;
    MaxV=modelparm.MaxV ; % defined by training dataset.
    MinV=modelparm.MinV ;

    pkf=peakfeatures;
    maxVm=ones(size(pkf(:,1)))*MaxV(:)';
    minVm=ones(size(pkf(:,1)))*MinV(:)';

    % if there are NaN,inf in pkf, make it to min V or max V
    % maybe this is not the best way to deal with it. % thie part are
    % slightly differnet then previously defined.

    cc=isnan(pkf) ;
    pkf(cc)=minVm(cc);
    cc=isinf(pkf) ;
    pkf(cc)=maxVm(cc) ;
    [pkf] = ScaleW(pkf,Lower,Upper,MaxV,MinV);

    cc=isnan(pkf) ;
    pkf(cc)=0;

    testdata=pkf(:,:);
    SVMmodel=modelparm.SVMmodel;
    [Group,~,~] = svmpredict2(ones(size(testdata(:,1))), testdata, SVMmodel,
'-b 1');

    svm_pk_class=Group(:); % classificaitno by svm , good /no good
else
    svm_pk_class=[]; % classificaitno by svm , good /no good
end

% save organized output resultls
p.iminfo=iminfo;
res.param=p; % used parameters setting
res.frameset0=frameset0; % frames that is used in analysis
res.bff=bff; % 2D projection image after 3D convolution.
res.bw=bw; % domain segmetnation image
res.L=L; % labeled domain segmentation image
res.A=A; % Area of each domain from domain segmetnation image
res.obnum=obnum; % number of domain based on domain segmentaion image
res.medmat=medmat; % median intenisty for each domain
res.stdmat=stdmat; % standard deviation in intensity profile for each domain

res.intout=intout; % differnet type of intenisty profiles of domains

```

```

res.intoutf=intoutf;
res.intoutb1=intoutb1;
res.intoutb2=intoutb2;
res.intoutb3=intoutb3;
res.intout0=intout0;
res.intoutbw=intoutbw; % binarized domain intensity profiles : 1 means
detecting as signal. 0 means no signal.

res.pkinfo=pkinfo; % detected peak informaiton
res.peakfeatures=peakfeatures; % features of each detected peaks
res.peak_int_t=peak_int_t;

res.svm1_pk_class=svm_pk_class; % peak goodness based on svm classication

toc
end
function res = bpass1d(arr,lb,hb)
%
b = double(lb);
r = round(hb);
w = 2*r + 1;

r = ((0:w-1) - r)/(2 * b);
gx = exp( -r.^2) / (2 * b * sqrt(pi));

mx = ones(1,w)/w;

res = arr(:)';
g = conv(res,gx,'valid');

tmpres = res;
res = conv2(tmpres,mx,'valid');

res0=zeros(size(arr));
g0 = zeros(size(arr));

res0((lobject+1):end-lobject) = res;
g0((lobject+1):end-lobject) = g;

res=max(g0-res0,0);
end
function [scaled, Lower, Upper, MaxV, MinV ] = ScaleW(Data, Lower, Upper,
MaxV, MinV)

if (nargin<3)
Lower = -1;
Upper = 1;
elseif (Lower > Upper)
disp ('Wrong Lower or Upper values!');
end
if nargin<=3 % calculate MaxV and MinV
[MaxV, ~]=max(Data);
[MinV, ~]=min(Data);
end

```

```

[R,C]= size(Data);
    scaled=(Data-ones(R,1)*MinV).*(ones(R,1)*((Upper-
Lower)*ones(1,C)./(MaxV-MinV))+Lower;
    scaled=min(Upper, scaled);
    scaled=max(Lower, scaled);
end
function pk_int=get_peak_intprofile(pkout0,intoutf)
    % obtain peak and sum_intenisty of a given detected signal
    pk_int=[];
    if ~isempty(pkout0)
        pk_int=zeros(size(pkout0(:,1:2)));
        for kk=1:length(pkout0(:,1))
            xid=pkout0(kk,1);
            yid1=pkout0(kk,5):pkout0(kk,6);
            ytemp=intoutf(yid1,xid);
            sii=sum(ytemp); % sum_intenisty
            pkii=max(ytemp); % peak_intensity
            pk_int(kk,:)=[pkii,sii];
        end
    end
end
function im3f=bpass3d_v1(im,param)
% 3D band pass convolution
% im : stacked images
%     format1 : N*1 cells and each cell corrposdence to a image with size
%     of h*w
%     format2 : h*w*N matrices
% % processing is done using single precision- for reducing memory loading
% bim : processed image
% developed by : Pei-Hsun Wu, Ph.D
% 10/28/2014 @ Johns Hopkins University

% set bandpass process parameteres
if nargin==1
    lb=1; % low bound size for in-x,y dim
    hb=11; % high bound size for in-x,y dim
    zlb=1;% low bound size for in-z(t) dim
    zhb=21; % high bound size for in-z(t) dim
else
    lb=param.lb;
    hb=param.hb;
    zlb=param.zlb;
    zhb=param.zhb;
end

% obtain the 3D image size
if iscell(im)
    znum=length(im);
    [h,w]=size(im{1});
else
    [h,w,znum]=size(im);
end

im3=single(zeros(h,w,znum));

```

```

% convolution in 2D (x,y direction first through whole stack
if iscell(im)
    parfor kbs=1:znum % time period without drug
        a=single(im{kbs});
        b=bpassW(a,lb,hb);
        im3(:,:,kbs)=single(b);
    end
else
    parfor kbs=1:znum % time period without drug
        a=single(im(:,:,kbs));
        b=bpassW(a,lb,hb);
        im3(:,:,kbs)=single(b);
    end
end

im3f=im3;
% bandpass filtering over z (t) dim
parfor kx=1:w
    for ky=1:h
        temp=squeeze(im3(ky,kx,:));
        im3f(ky,kx,:)=single(bpass1d(temp,zlb,zhb));
    end
end

function bw=domain_segment(bff,Areacut)
% segment the calcium domains area
if nargin==1
    Areacut=25;
end
[hh,ww]=size(bff);

if hh==ww
    mskc=mskcircle(length(bff));
else
    rr=5;
    mskc=zeros(size(bff));
    mskc(rr+1:end-rr,rr+1:end-rr)=1;
end
test=bff.*mskc;
[bge,rbge]=estibkgkmean(test(test>0));
bw=bff>bge+2*rbge;
% bw=bff>80; %(100) set threshold to binarize the locations demonstrate
% spatial temporal distinctive

% xyc is the just to highlighted the center region of images. morelikely
% where the cell is located

b000=bpassW(bff,3,21); % default 3,21;
nbw=imregionalmax(b000,8);
nbw=imdilate(nbw,strel('disk',2));
nbw=nbw & bw ;

% watershed segmentation
cbw=bw | nbw;
D=bwdist(nbw);
DL=watershed(D);

```

```

        cbw(DL==0)=0;
        cbw00=cbw<0; % preallocateing cbw00

    ln=bwlabel(nbw);
    lc=bwlabel(cbw);

    DLrev=DL < 0 ;
    for k=1:max(lc(:))
        idx=ln(lc==k);
        [uidx]=unique(idx);
        if length(uidx)==1;
            bwtemp=lc==k;
            cbw00=cbw00 | bwtemp; % collect these non-nucleated reguion
            bwtemp=imdilate(bwtemp,strel('disk',2));
            DL00= DL==0 & imdilate(bwtemp,strel('disk',2));
            DLrev=DL00 | DLrev;
        end
    end

    bw=cbw & ~cbw00; % does not take the one without nuclesate
    bw=bwareaopen(bw,Areacut); % get rid of nodes with small area size
    bw=imfill(bw,'hole');

end
function res = bpassW(arr,lnoise,lobject)
%
% bandpass filter.
%
% Written by Pei-Hsun Wu,
% Post-doc associate, @ JHU, IMBT.
%
    b = double(lnoise);
    w = round(lobject);
    N=2*w+1;
    hg=fspecial('gaussian',N, b*sqrt(2));
    ha = fspecial('average',N);
    arra = imfilter(arr,hg-ha,'symmetric','conv');

    rest = max(arr,0);

    res=rest;
end
function intout=get_domain_int(im0temp,pattern)
    L=pattern;
    obnum=max(L(:));
    intout=zeros(length(im0temp),obnum); % matrix with size of (frame # *
domain #)
    % normalized the intensity shift for correct the bleaching .
    parfor kbs=1:length(im0temp); % get intenisty of each domains at
different time frames
        a=(im0temp{kbs});
        for kll=1:obnum
            intout(kbs,kll)=sum(a(L==kll));
        end
    end
    intout=double(intout);
end
end

```



```

function [bkg_int]=get_bkg_int(intout0)
    span=100;
    porder=1;
    bkg_int=zeros(size(intout0));
    parfor kbs=1:length(intout0(1,:)); % get mean intensity of each frame,
        bkg_int(:,kbs)=smooth(intout0(:,kbs),span,'sgolay',porder);
    end
end
function [pkout,intoutbw]=peak_detect_v2(intout0,p)
% pkout : N*4 matrix, (N: number of peaks;
%         4 columns are 1. domain id, 2.time id, event width, event peak
%         int.
    intoutbw=zeros(size(intout0));
    obnum=size(intout0,2);
    pkout=[];
    for kii=1:obnum
        ytemp=intout0(:,kii);
        bw=ytemp> p.min_int_ed;
        L0=bwlabel(bw);
        bwnew=bw<0; %(zero logical matrix)

[~,locs]=findpeaks(ytemp,'minpeakheight',p.peak_int_ed,'MINPEAKDISTANCE',p.min_peak_dist_ed);
        for kll=1:length(locs)
            bwnew= bwnew | L0==L0(locs(kll));
        end
        intoutbw(:,kii)=(bwnew(:)); % eliminate signal with less than 5 span
away;

        bw=bwnew;

        L0=bwlabel(bw);
        % peak segmentation
        % segment when there are more than one peaks in an detected evnt
        (bw).

            test=L0(locs);
            kold=1;
            for ktt=1:length(test)-1
                kcurrent=ktt+1;
                if test(kold)==test(kcurrent); % if repeated. then segmented
                    id=locs(kold):locs(kcurrent);
                    col=find(ytemp(id)==min(ytemp(id)));
                    col=col(1);
                    h1n=ytemp(id(1));
                    h2n=ytemp(id(end));
                    h1=ytemp(id(1))-min(ytemp(id));
                    h2=ytemp(id(end))-min(ytemp(id));
                    hr1=h1/ytemp(id(1));
                    hr2=h2/ytemp(id(end));
                    d1=col-1;
                    d2=length(id)-col;
                    thp=3;
                    tha=3;
                    ccid=col+locs(kold)-1;

                    if h1 > thp && h2 > tha && d1>1 && d2>1 && (hr1 >0.5 &&
hr2 > 0.5); % condiitons for segments.

```

```

        if h1n>p.peak_int_ed*2 && h2n > p.peak_int_ed*2
            bw(ccid)=0; % apply segment
            kold=kcurrent; % update the kcurrent value
        end
    elseif h2>h1
        kold=kcurrent;
    end
else
    kold=kcurrent; % update the kcurrent value
end
end

% reanalyze the peak info based on new segmentation result
L0 = bwlabel(bw); % new label on updated bw;

% remove the event start from first frame or last til last
% frame
temp2=L0(1);
if temp2>0
    L0(L0==temp2)=0;
end
temp2=L0(end);
if temp2>0
    L0(L0==temp2)=0;
end

bw=L0>0; % update binary activation signal
L0= bwlabel(bw); % update label;

bwnew = zeros(size(bw));
% only collect the ones with signal
for kll=1:max(L0(:))
    % recalculate peak info.
    bwtemp1=L0==kll;
    loctemp=find(bwtemp1==1); % get peaklocation;
    [pkh,ploc]=max(ytemp.*bwtemp1); % peak height and peak
locations
    ploc=ploc(1); % if there are more than one peaks with same
maximum value, take first one.

    if sum(bwtemp1)> p.min_peak_length
        % only harvest the peak with length more the threshold
        % value.
        pkl=sum(bwtemp1); % peak length
        bwnew= bwnew | bwtemp1; % update binary info
        f_start=loctemp(1);
        f_end=loctemp(end);

        pkres=[kii,ploc,pkl,pkh, f_start f_end];
        pkout=[pkout;pkres];
    end
end

intoutbw(:,kii)=(bwnew(:)); % eliminate signal with less than 5
span away;

```

```

end
end
function [bkg,rb]=estibkg(I,iter,gmode)
% estimate the image background using a iterative process
%
%*****
% written by :
%           Pei-Hsun Wu, PhD
%           Institue for Nano-bio technology
%           Johns Hopkins University
%
% Last update: 08/19/2013
%*****%
%
if nargin==2;
    gmode='iterNspace';
end

drr=2;
binnum=40;
switch(gmode)
    case('iter')

        I=double(I(:));

        itop= mean(I)+ drr* std(I) ; % 16 bit
        for mm=1:iter
            [c1,c2]=hist(I(I < itop),40);
            mimg= c2(c1 == max(c1)) ;      mimg=mimg(1);
            ira=std(I(I < itop));
            itop= mimg + drr*ira ;
        end
        bkg=mimg ;
        rb= ira ;

    case('gaufit')

        I=double(I(:));
        mimj = mode(I); % initial guess
        rb=std(I);
        [c1,c2]=hist((I((I < mimj +3*rb))),30);
        [fr]=fit(c2(:),c1(:),'gauss1');
        bkg=fr.b1 ;
        rb=fr.c1/sqrt(2) ;

    case('dir')

        I=double(I(:));
        bkg= mean(I);
        rb=std(I);
    case('iterNspace')
        I1=I;

        I=double(I(:));

```

```

        itop= mean(I)+ drr* std(I) ; % 16 bit
    for mm=1:iter
        [c1,c2]=hist(I(I < itop),binnum);
        ming= c2(c1 == max(c1)) ;      ming=mimg(1);
        ira=std(I(I < itop)) ;
        itop= ming + drr*ira ;
    end
    bkg=mimg ;
    cc=I1 < bkg;
    cc=imclose(cc,strel('disk',3));
    bkg= mean(I1(cc));
    rb=std(I1(cc));
end
end
function [bkg,rb,rg]=estibkgkmean(I,Nmode)
% using kmeans classification to identify the background
%
    if nargin==1
        Nmode=2;
    end

    [idx,C]=kmeans (I,Nmode);
    [~,sid]=sort(C,'ascend');
    idx0=zeros(size(idx));
    for k=1:Nmode
        idx0(idx==sid(k))=k;
    end

    Ibg=I(idx0==1);
    rg=[min(I(idx0==1)),max(I(idx0==1))];
    bkg=mean(Ibg);
    rb=std(Ibg);
end

```
